# Supplementary material for: Discovery and characterization of sweetpotato’s closest tetraploid relative
Source: PubMed Central journal article supplement (PMC9306577; doi:10.1111/nph.17991), 2022-02-08
Supplement: NPH-234-1185-s001.pdf [file NPH-234-1185-s001.pdf]

## **New *Phytologist* Supporting Information**

Article title: Discovery and characterisation of sweetpotato's closest tetraploid relative  
Authors: Pablo Muñoz-Rodríguez, Tom Wells, John R.I. Wood, Tom Carruthers, Noelle L. Anglin, Robert L. Jarret & Robert W. Scotland  
Article acceptance date: 16 January 2022

The following Supporting Information is available for this article:

**Fig. S1** *Ipomoea aequatoriensis* specimen PI 355830/K300/CH71.3.

**Fig. S2** *Ipomoea aequatoriensis* specimen K500/CH80.3.

**Fig. S3** *Ipomoea aequatoriensis* specimen PI 561248/CIP 403553.

**Fig. S4** *Ipomoea aequatoriensis* specimen PI 561258.

**Fig. S5** *Ipomoea tabascanana* specimen PI 518479/CIP 460824 and *I. batatas* var. *apiculata* specimen PI 518474/CIP 403953.

**Fig. S6** *trnL-rpl32* chloroplast DNA barcode phylogeny

**Fig. S7** Nuclear phylogenies of *Ipomoea* Clade A3 indicating the position of the Ecuadorian tetraploids and the modern hybrids

**Fig. S8** Nuclear phylogenies of *Ipomoea* Clade A3 indicating the position of the Ecuadorian tetraploids and the modern hybrids. Phylogenies inferred including IUPAC characters for heterozygous sites

**Fig. S9** Additional Principal Component Analyses

**Fig. S10** Scientific illustration of *Ipomoea aequatoriensis* T.Wells & P.Muñoz

**Table S1** Tetraploid accessions in previous studies, indicating past and present identifications (Excel file)

**Table S2** Passport data of all samples included in morphological analyses (Excel file)

**Table S3** Passport data of all samples included in phylogenetic analyses (Excel file)

**Table S4** Statistics of the putative single copy nuclear regions used in phylogenetic analysis (Excel file)

**Table S5** Patterns of nucleotide heterozygosity in k-mer spectra of sequencing reads (k=21).

**Methods S1** Preliminary analysis of the *trnL-rpl32* chloroplast DNA region

**Methods S2** K-mer analysis of putative hybrid tetraploids

**Methods S3** Additional phylogenetic analysis of nuclear probes

**Methods S4** Additional Principal Component analyses.

**Methods S5** K-mer analysis of putative hybrid tetraploids.

**Notes S1** Modern hybrids closely related to *Ipomoea batatas*

**Notes S2** K-mer analyses diagrams.

**Notes S3** Description and additional information for *Ipomoea aequatoriensis*.

**Notes S4** Hybrid specimens in other studies.

**Supplementary References**

**Figure S1.** *Ipomoea aequatoriensis* specimen PI 355830/K300/CH71.3. Collected by C. M. Rick s.n. (Ecuador, 1970). Seeds received from USDA and grown at University of Oxford Department of Plant Sciences. Photographs by Tom Wells. A: Habit; B: Roots; C: Inflorescence.

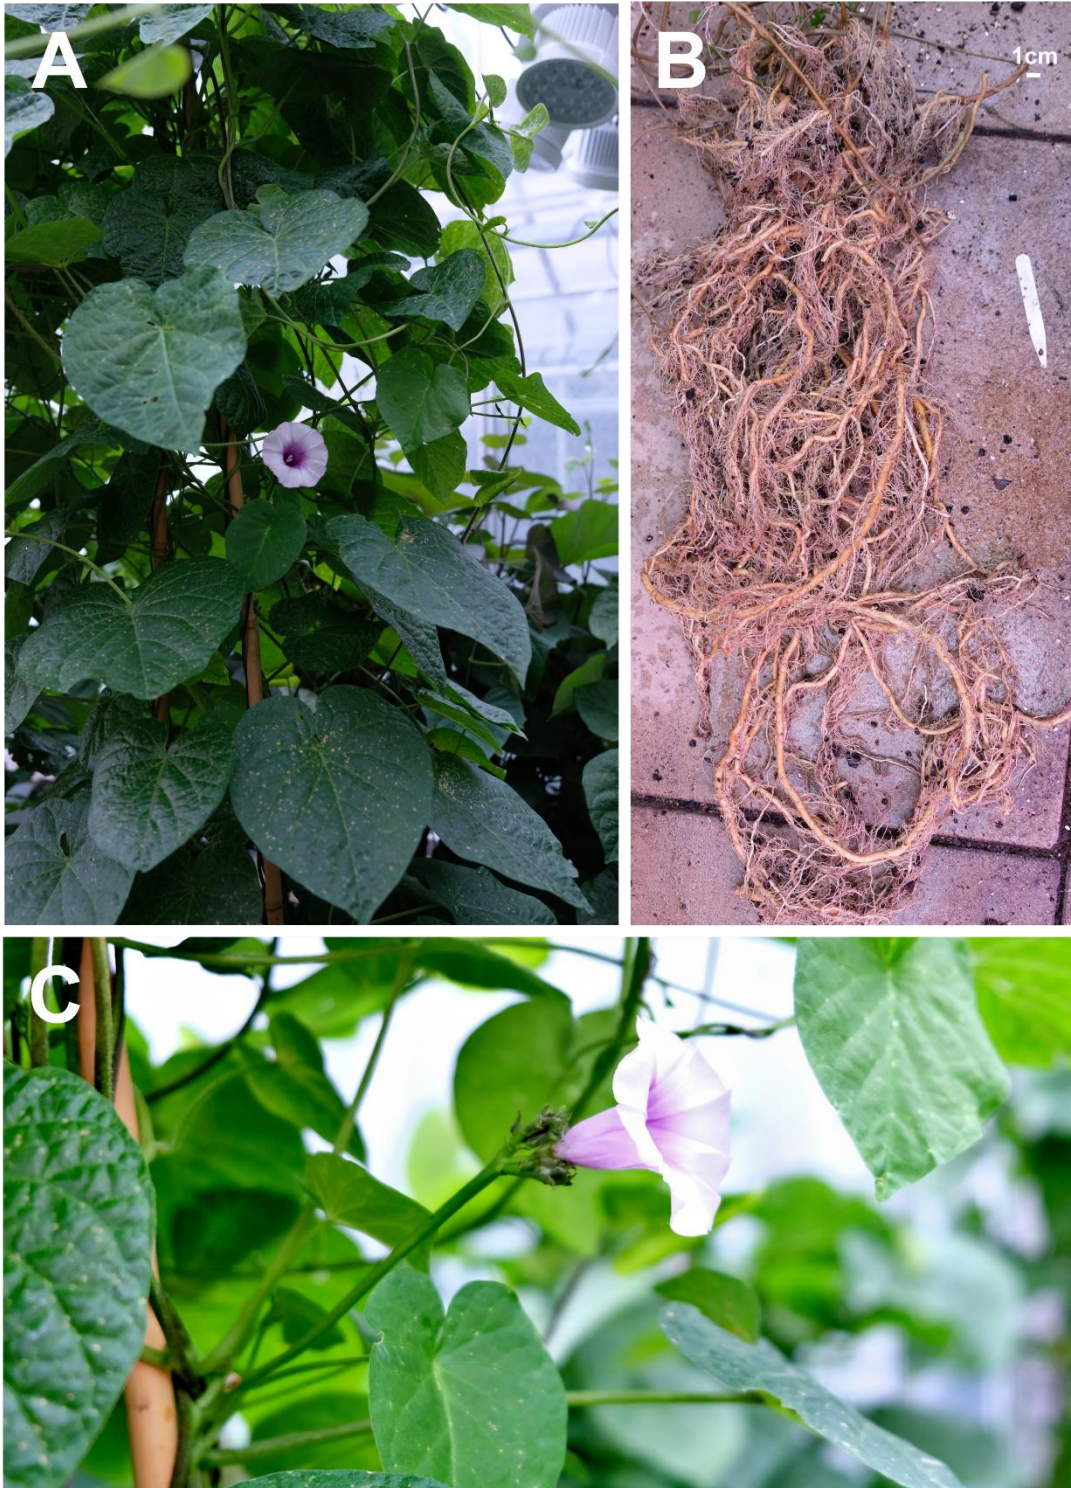

**Figure S2.** *Ipomoea aequatoriensis* specimen K500/CH80.3: Collected by *M. Kobayashi* s.n. (Colombia, 1976). Seeds received from USDA and grown at University of Oxford Department of Plant Sciences. Photographs by Tom Wells. A: Inflorescence; B: Roots; C: Habit and trilobed leaves.

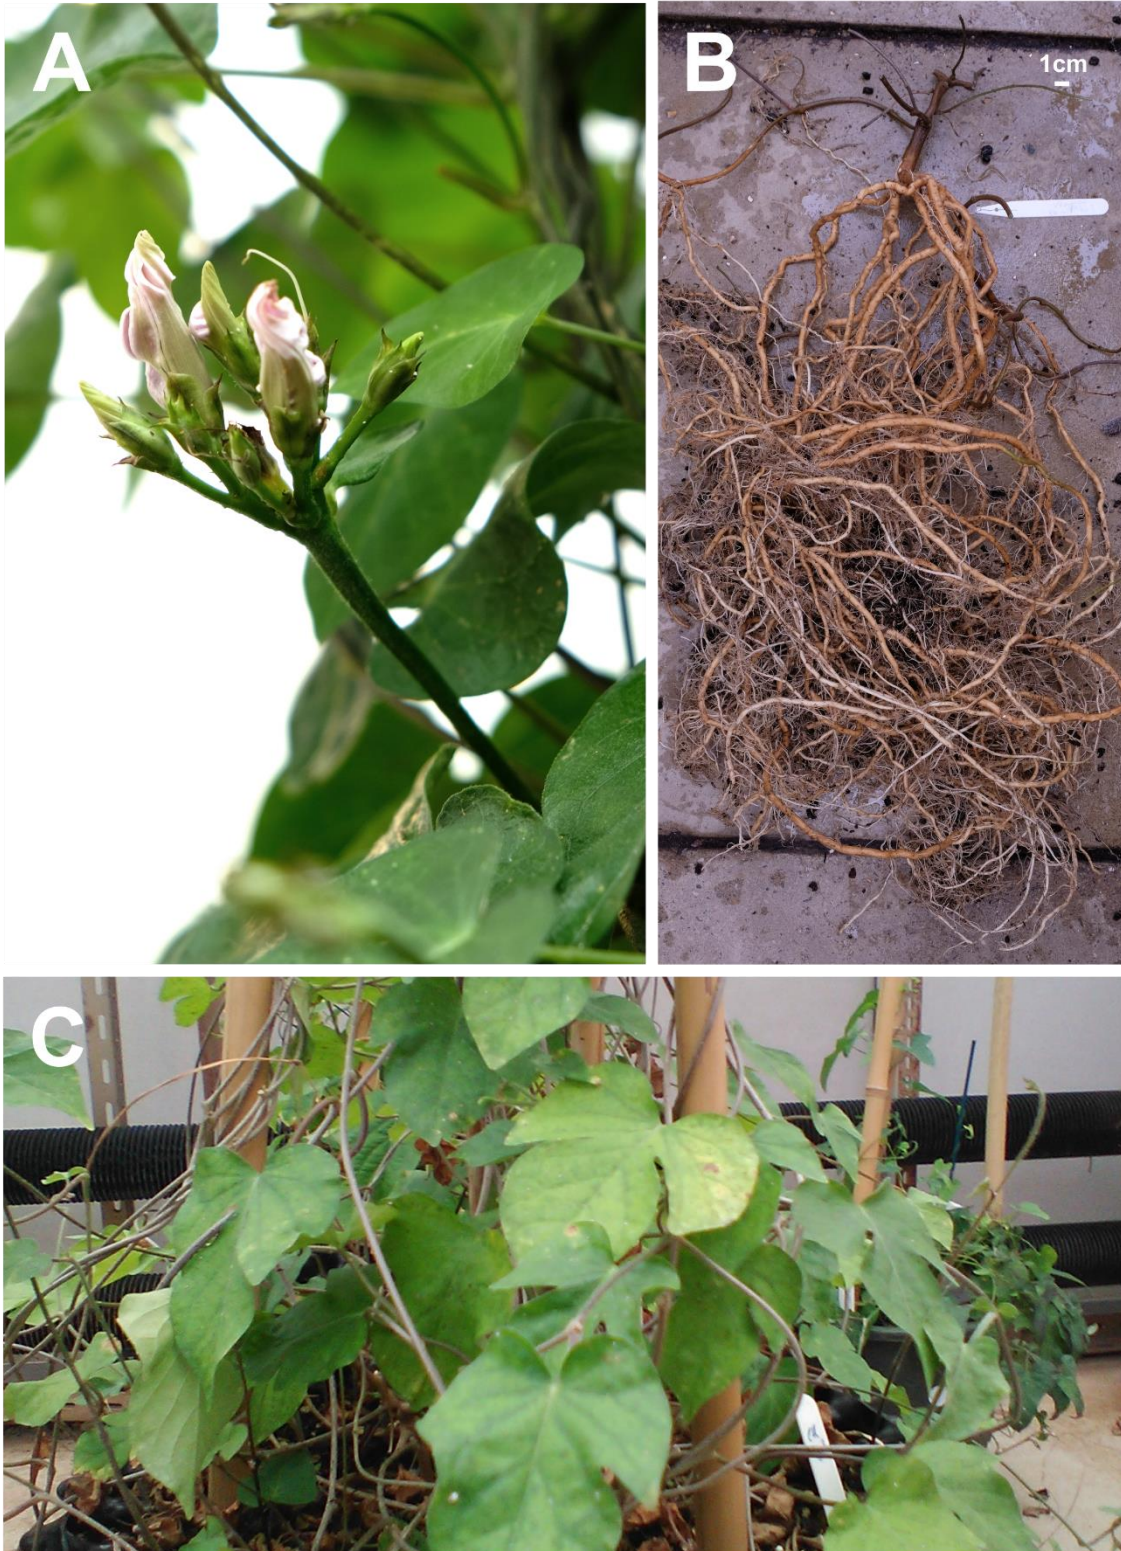

**Figure S3.** *Ipomoea aequatoriensis* specimen PI 561248/CIP 403553. Collected by *D. F. Austin* 7803 & *F. De La Puente* 5284 (Ecuador, 1992). Seeds received from USDA and grown at University of Oxford Department of Plant Sciences. Photographs by Tom Wells.  
A: Habit; B: Roots; C: Lobed and unlobed leaves

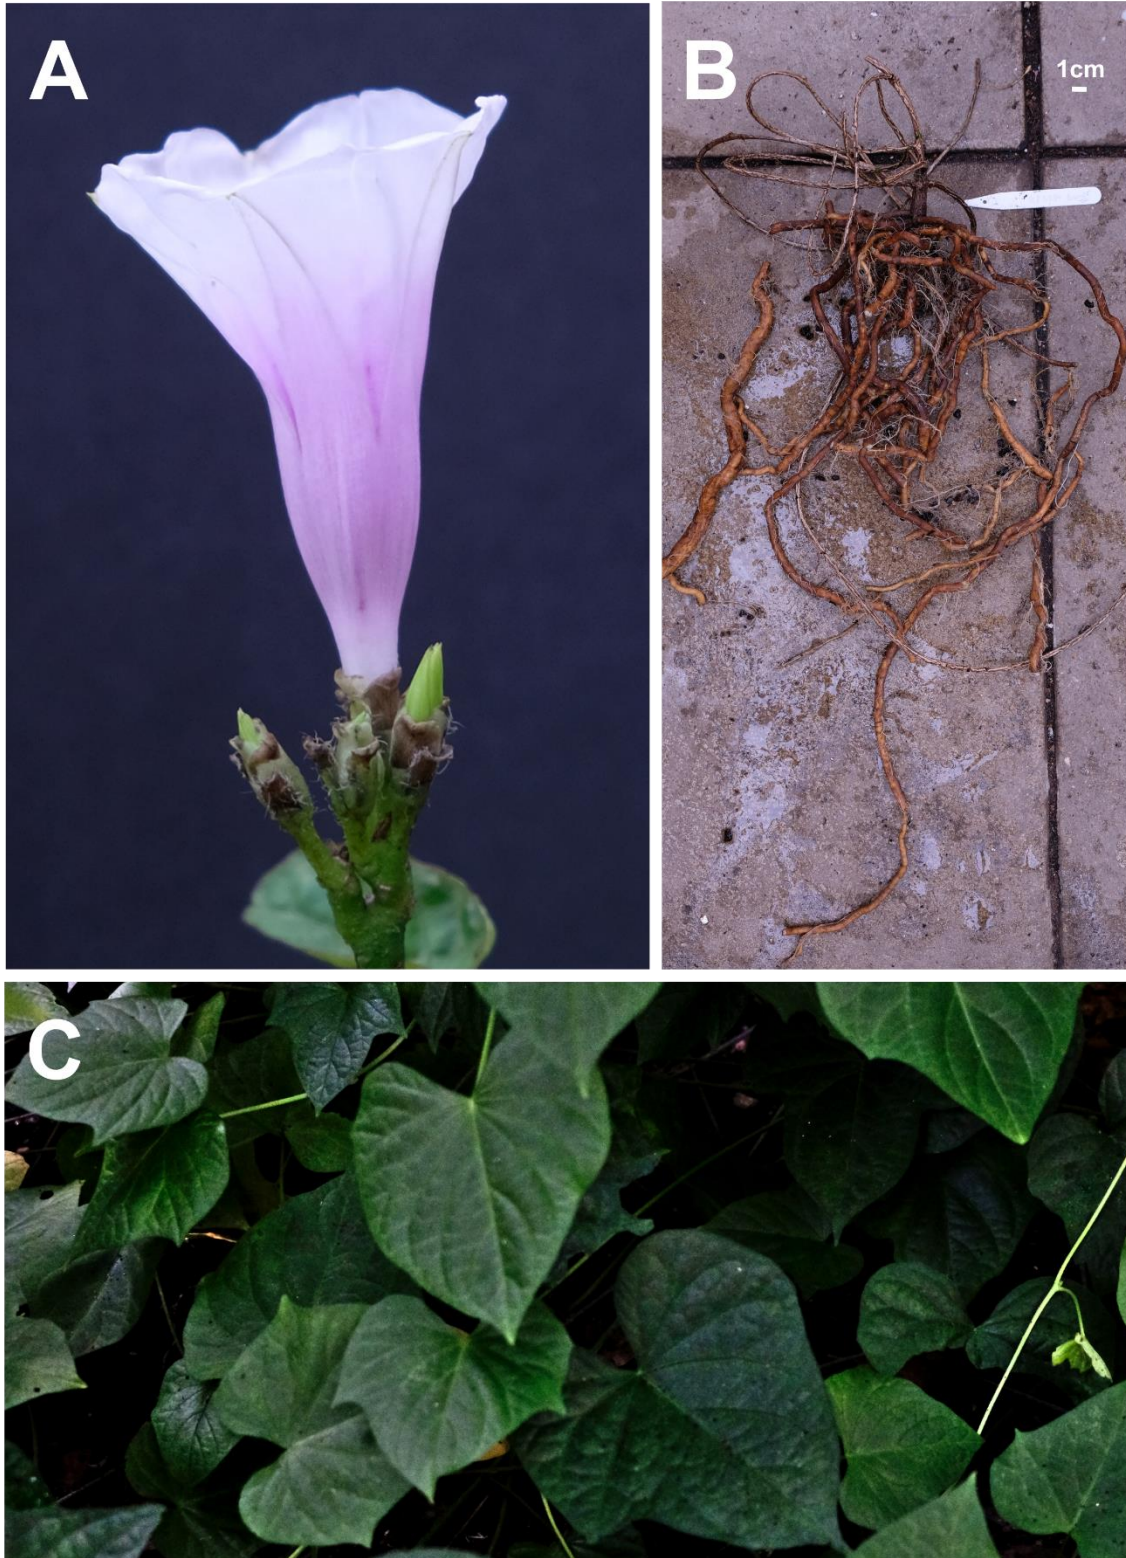

**Figure S4.** *Ipomoea aequatoriensis* specimen PI 561258. Collected by *D. F. Austin* 7817 & *F. De La Puente* 5298 (Ecuador, 1992). Seeds received from USDA and grown at University of Oxford Department of Plant Sciences. Photographs by Tom Wells. **A:** Inflorescence and leaves; **B:** roots; **C:** corolla.

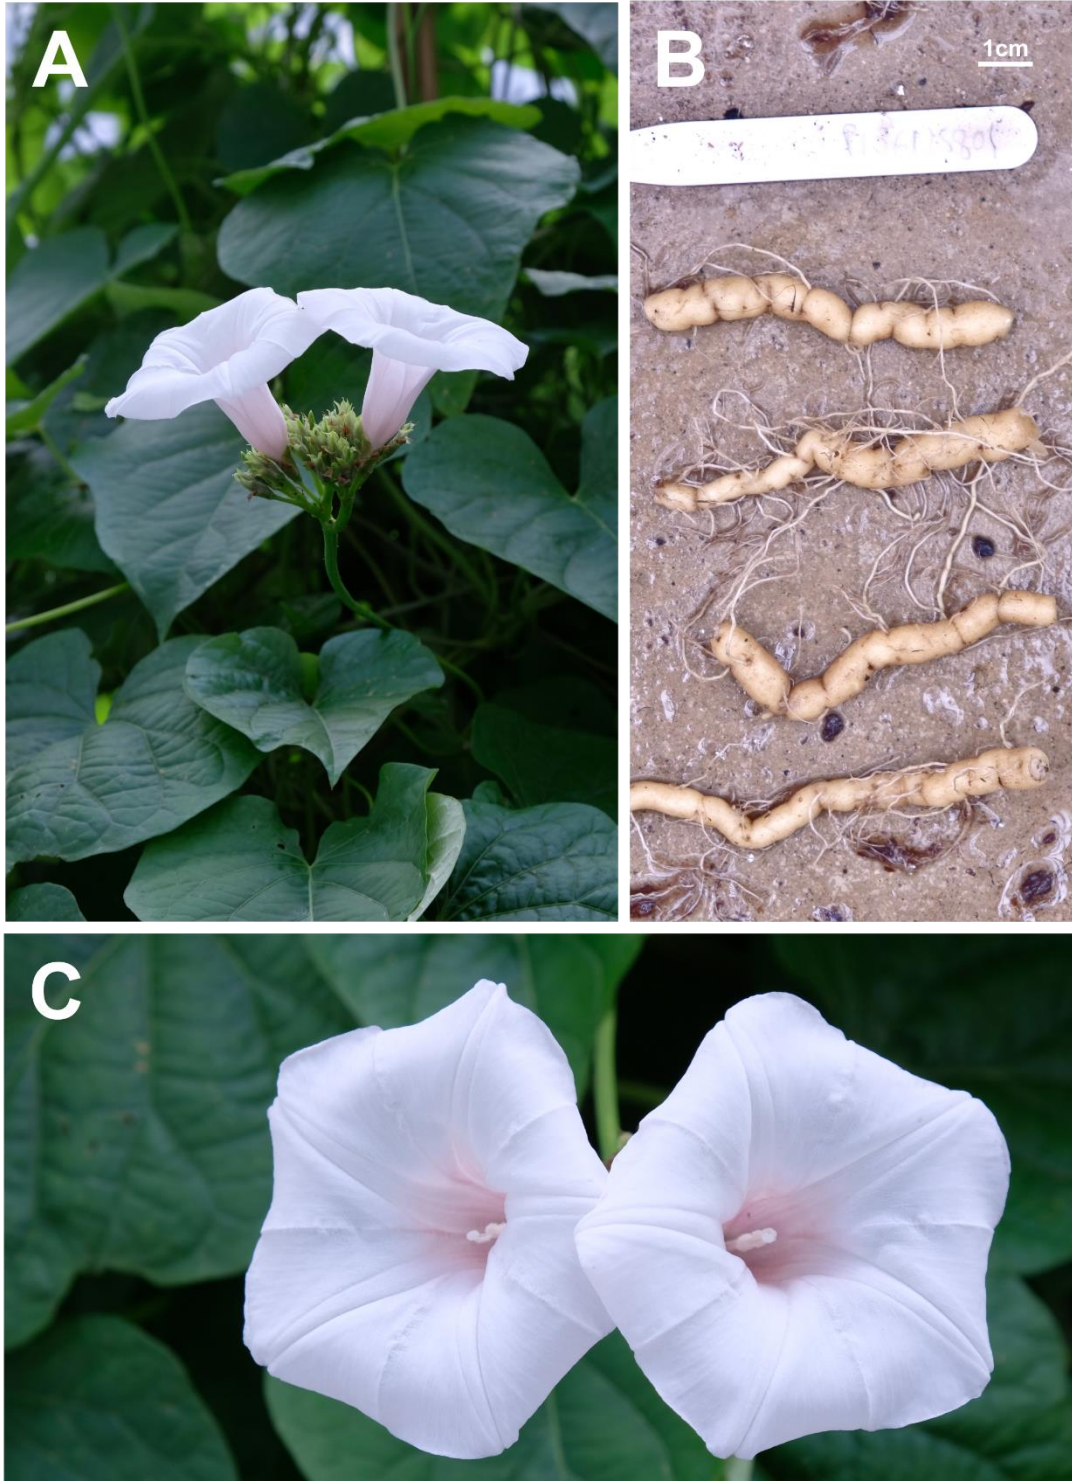

**Figure S5.** *Ipomoea tabascana* specimen PI 518479/CIP 460824 (A and C) and *I. batatas* var. *apiculata* specimen PI 518474-CIP 403953 (B). *Ipomoea tabascana* specimen collected by D.F. Austin 7505 & F. de la Puente 2946 (Mexico, 1990). *Ipomoea batatas* var. *apiculata* specimen collected by F. De La Puente 2908 (Mexico, 1987). Seeds received from USDA and grown at University of Oxford Department of Plant Sciences. Photographs by Tom Wells and John Baker.

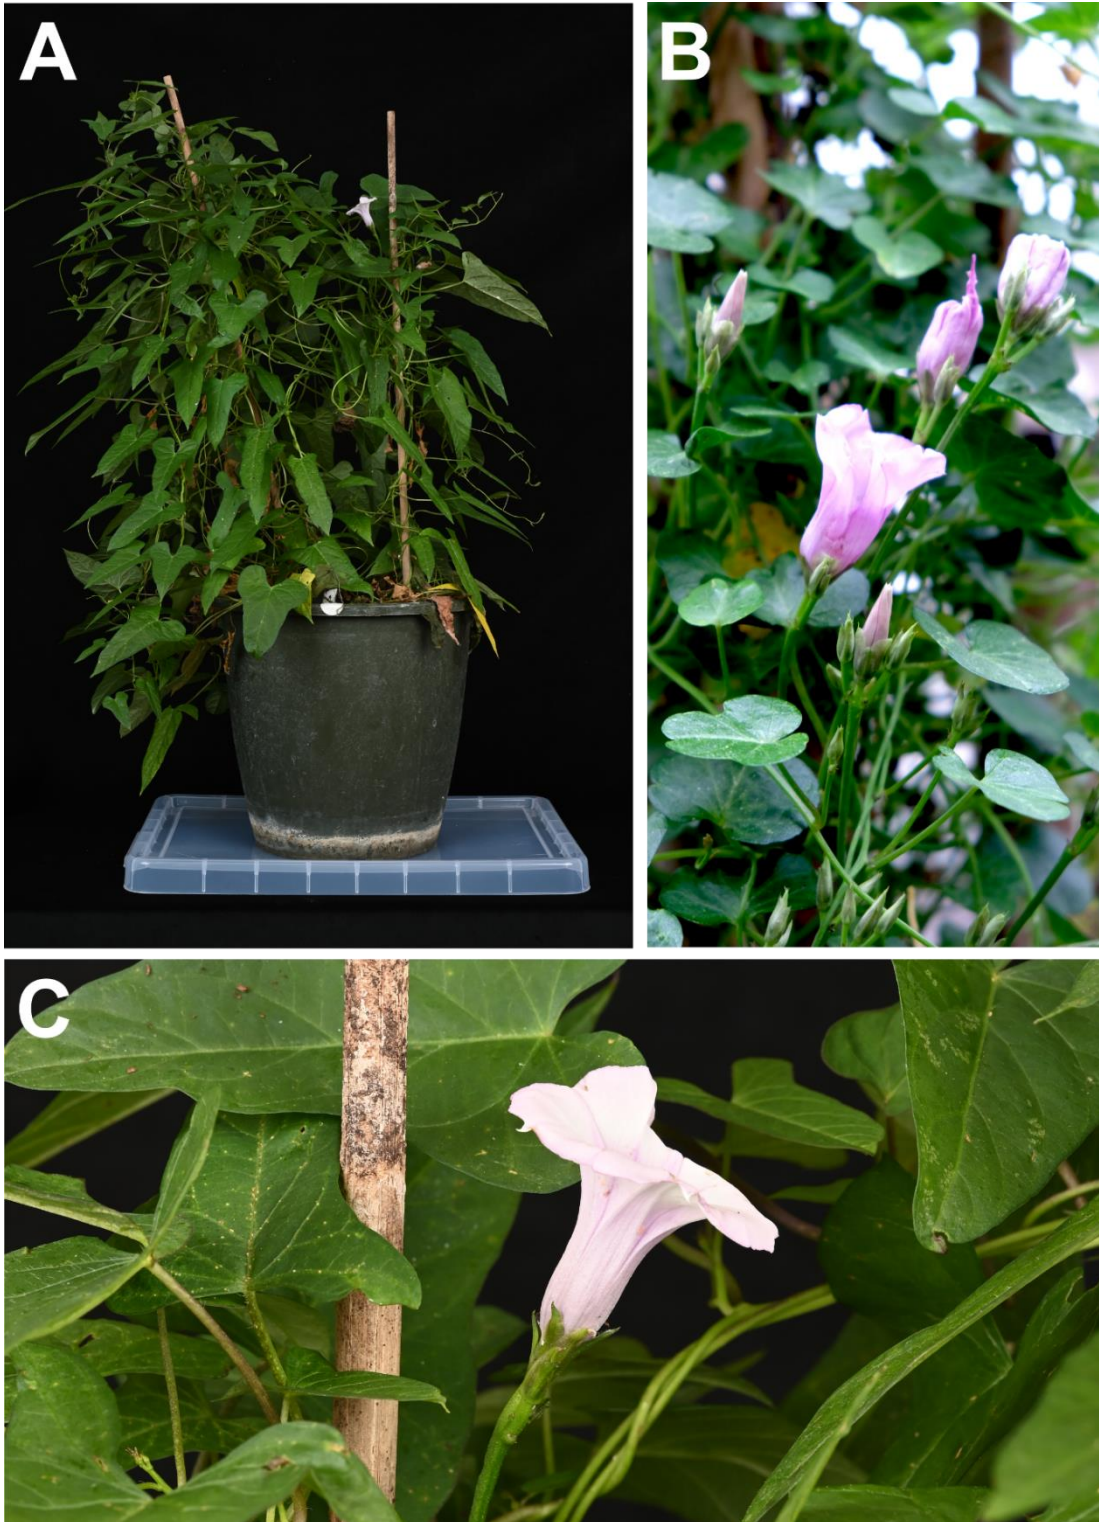

**Figure S6.** *trnL-rpl32* chloroplast DNA barcode phylogeny of the genus *Ipomoea* inferred using Approximate Maximum Likelihood in FastTree 2. Thick black line indicates the *Ipomoea* clade A3 (also referred to as Batatas clade). Green lines indicate *I. batatas* chloroplast lineage 1 and *I. aequatoriensis* (black crosses for *I. aequatoriensis*); and red lines indicate *I. batatas* lineage 2 with the Mexican hybrids.

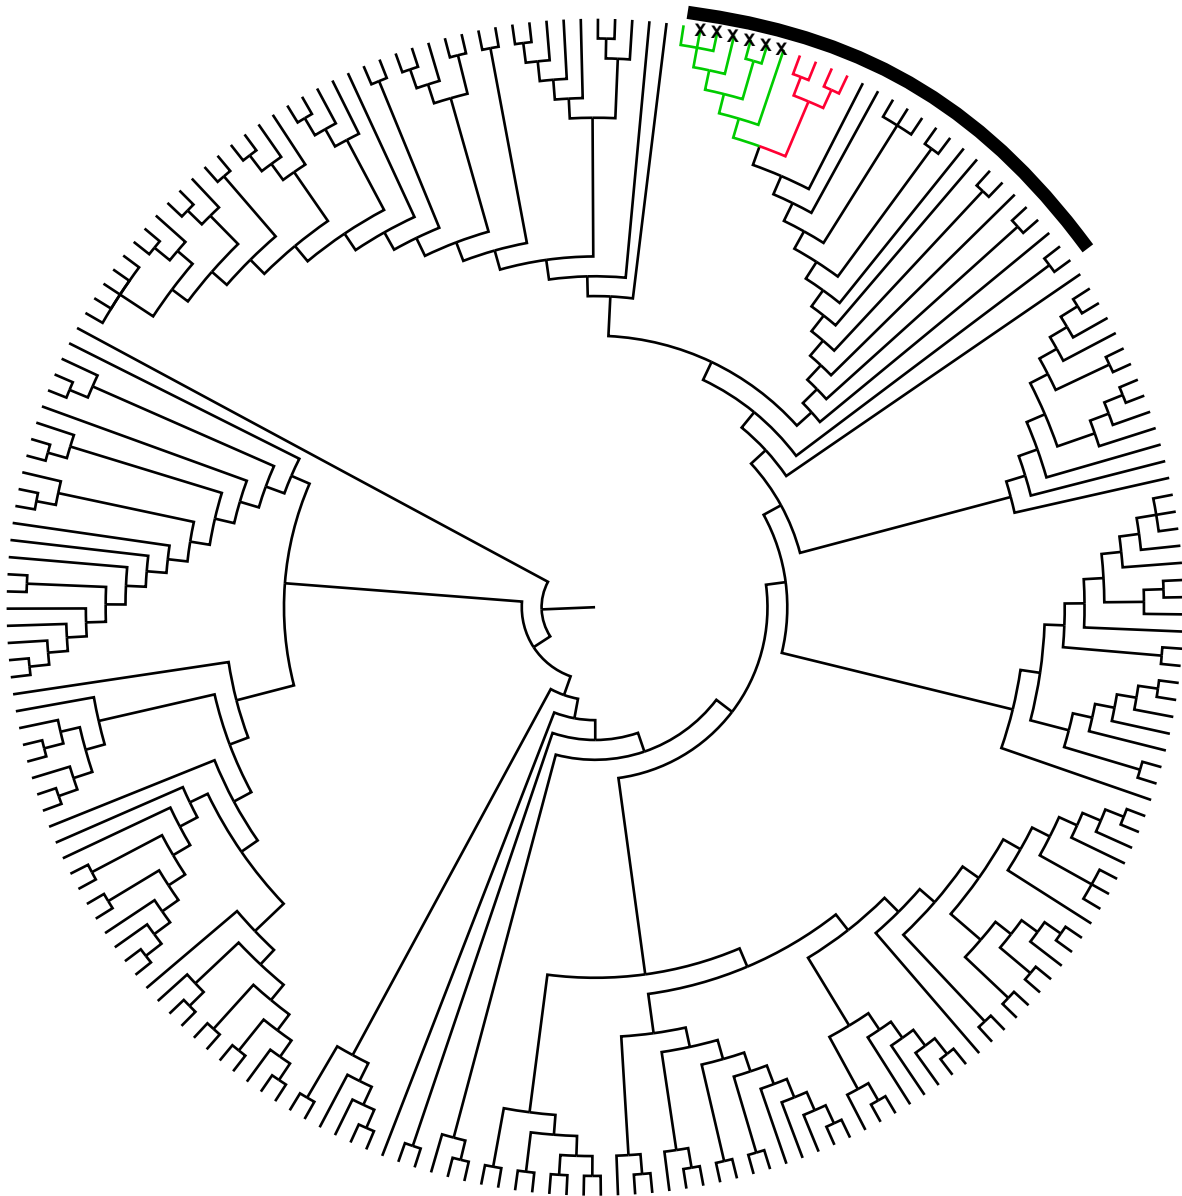



**Figure S7.** Nuclear phylogenies of *Ipomoea* Clade A3 indicating the position of the different tetraploid entities. (a) Maximum Likelihood (IQ-Tree), numbers on the branches indicate ultrafast bootstrap support (1,000 replicates). (b) Approximate Maximum Likelihood (FastTree2), numbers on the branches indicate Shimodaira-Hasegawa-like support values. (c) Species coalescent (Astral III), numbers on the branches indicate percentage of quartets that support the main topology and the two alternative topologies. Green, hexaploid *I. batatas*; red, *I. trifida*; blue, *I. aequatoriensis*; yellow, modern hybrids *I. tabascana* and *I. batatas* var. *apiculata*. Black dots indicate 100% support.

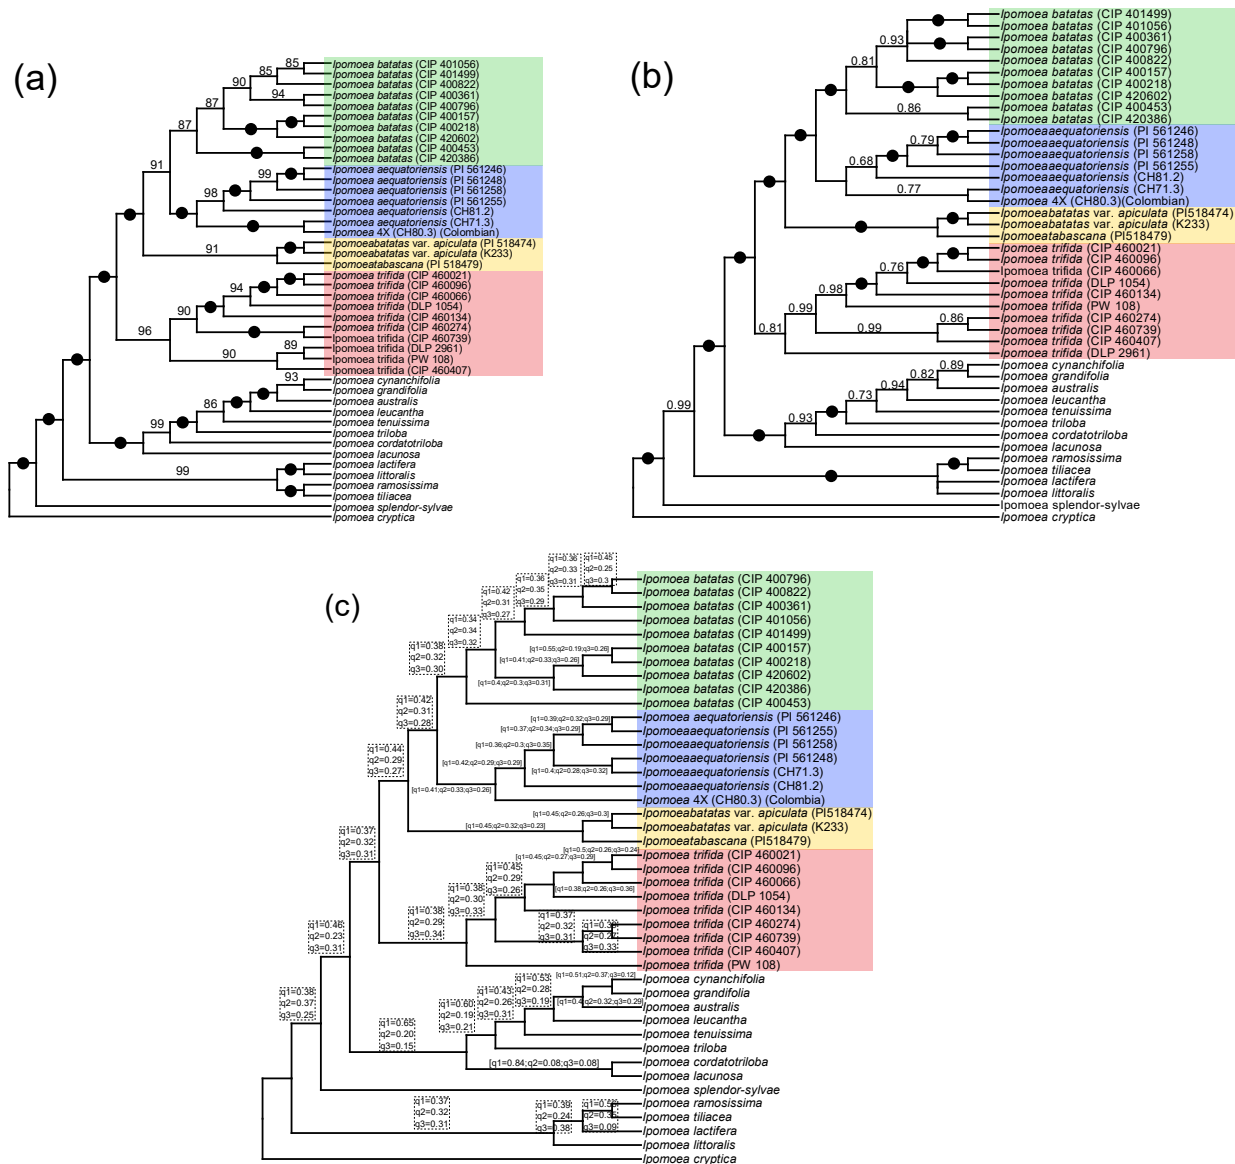

**Figure S8.** Nuclear phylogenies of *Ipomoea* Clade A3 indicating the position of the different tetraploid entities. Phylogenies inferred from consensus sequences including IUPAC ambiguous characters for heterozygous sites. (a) Species coalescent (Astral III), numbers on the branches indicate percentage of quartets that support the main topology and the two alternative topologies. (b) Approximate Maximum Likelihood (FastTree2), numbers on the branches indicate Shimodaira-Hasegawa-like support values. (c) Maximum Likelihood (IQ-Tree), numbers on the branches indicate ultrafast bootstrap support (1,000 replicates). Green, hexaploid *I. batatas*; red, *I. trifida*; blue, *I. aequatoriensis*; yellow, modern hybrids *I. tabascanana* and *I. batatas* var. *apiculata*. Black dots indicate 100% support.

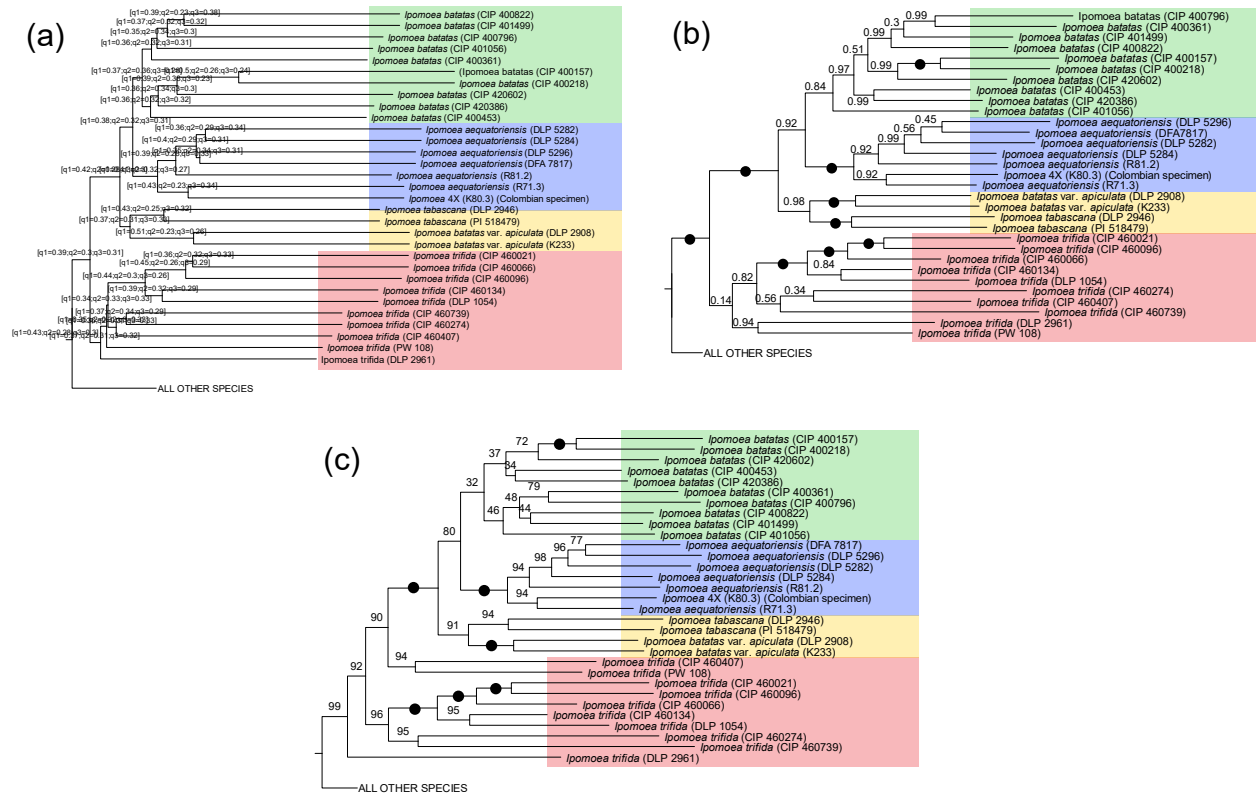

**Figure S9.** Additional Principal Component Analyses inferred using nuclear SNPs and all *Ipomoea trifida* (red dots) and *I. batatas* (green) samples in addition to *I. aequatoriensis* (blue) and the hybrids *I. tabascana* (black) and *I. batatas* var. *apiculata* (orange). (a) PCA inferred without a previous LD-pruning step using 914 SNPs. (b) PCA inferred after an LD-pruning step using 764 SNPs. Ellipses indicate normal distribution of the data. Light blue point indicates the Colombian specimen K500/CH80.3 discussed throughout the text.

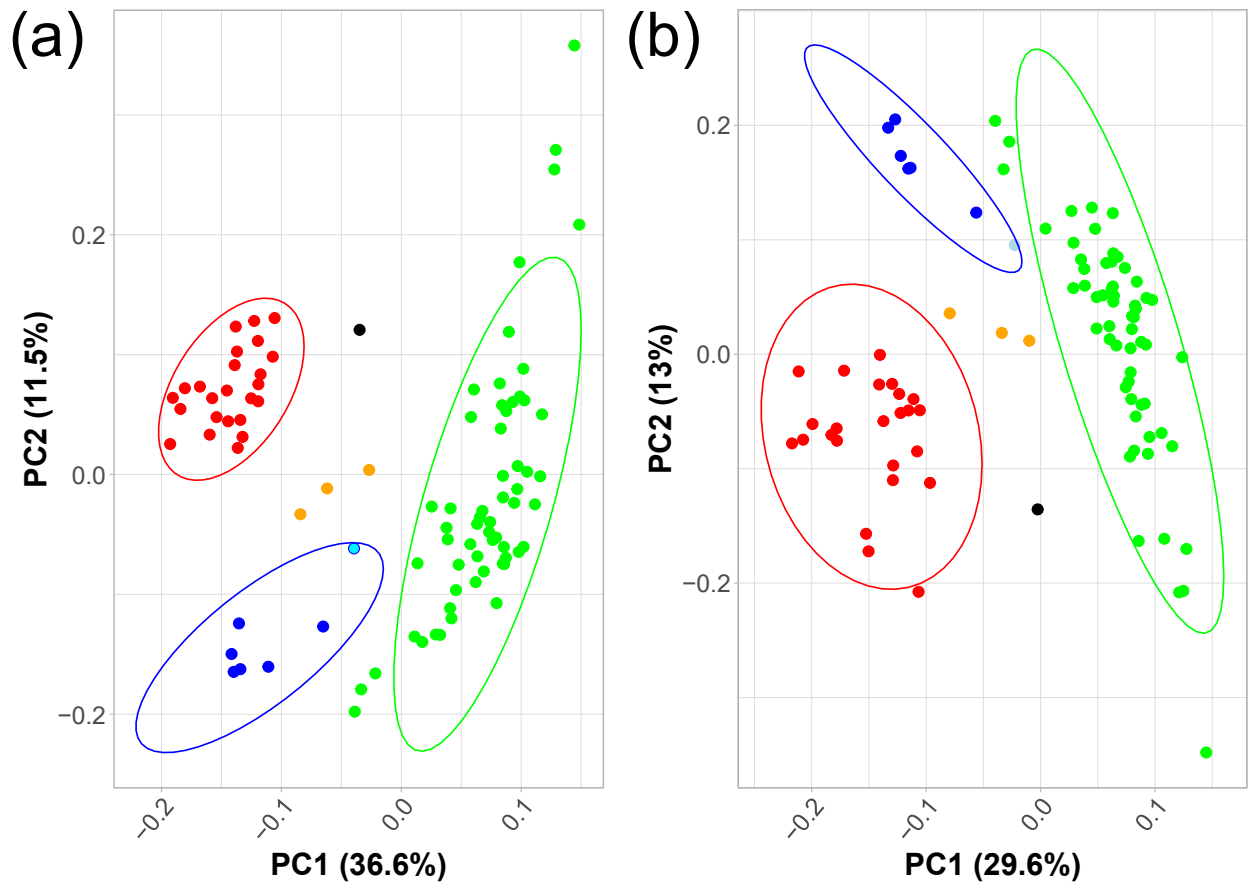

**Figure S10.** Illustration of *Ipomoea aequatoriensis*, showing: (a) habit with entire leaves and inflorescence; (b) stem with trilobed leaves; (c) leaf base, adaxial surface; (d) leaf base, abaxial surface with pair of glands; (e) sepals, outer (left) to inner (right); (f) corolla opened up to show stamens; (g) ovary and style. Drawn by Rosemary Wise from *Sparre* 15308 (A, C, D and E) and *Austin* 7817 (B, F and G).

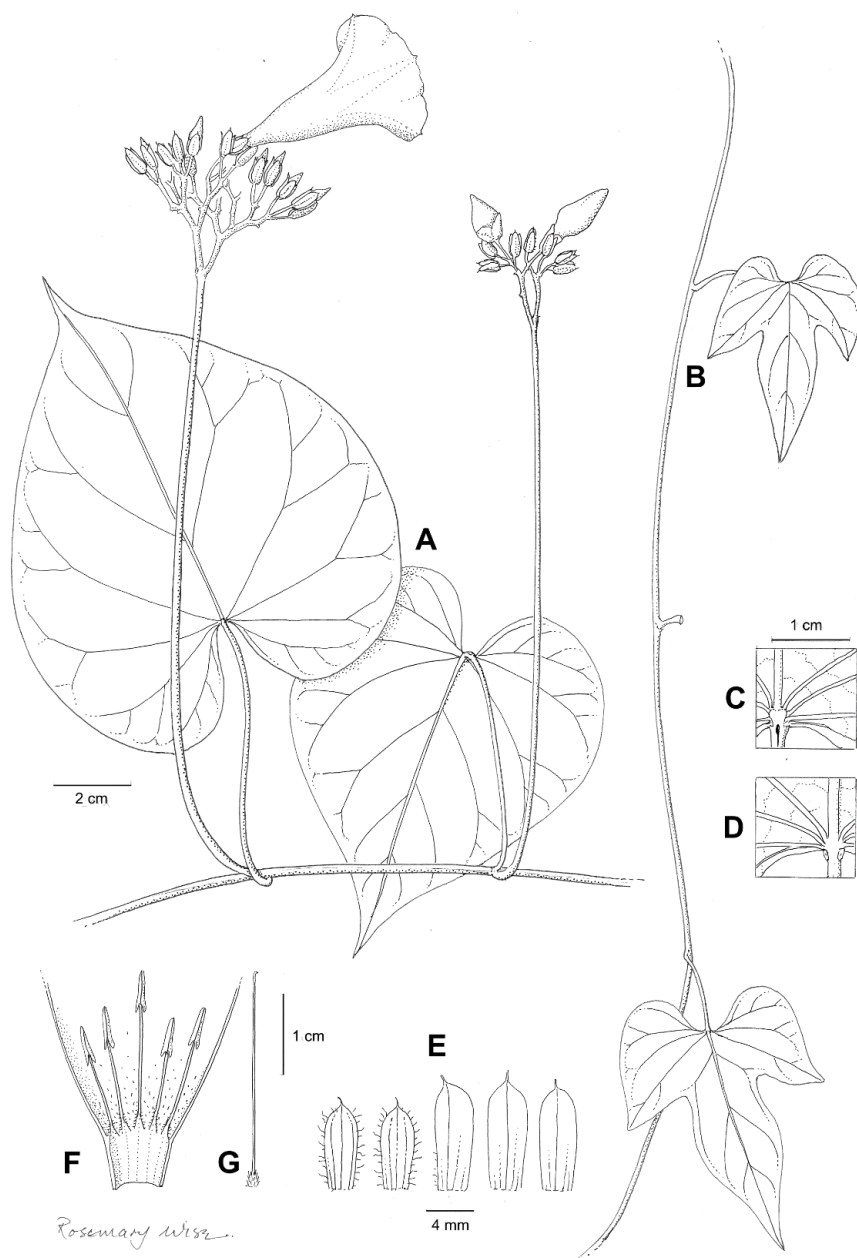

1 **Table S5.** Patterns of nucleotide heterozygosity in k-mer spectra of sequencing reads (k=21).

2 All samples tetraploid.

| Species                                 | Sample   | Origin  | Haploid length (bp) | Heterozygosity (%) | aaab (%) | aabb (%) | Read errors (%) |
|-----------------------------------------|----------|---------|---------------------|--------------------|----------|----------|-----------------|
| <i>I. aequatoriensis</i>                | PI561248 | Ecuador | 609,771,573         | 3.67               | 2.28     | 1.04     | 0.0746          |
| <i>I. batatas</i> var. <i>apiculata</i> | K233     | Mexico  | 456,325,693         | 12                 | 0.001    | 10.2     | 0.344           |
| <i>I. batatas</i> var. <i>apiculata</i> | PI518474 | Mexico  | 508,703,597         | 11.4               | 0.001    | 9.37     | 0.207           |
| <i>I. tabascanana</i>                   | PI518479 | Mexico  | 502,475,789         | 11.9               | 0.001    | 9.62     | 0.322           |

3

#### 4 **METHODS S1. Preliminary analysis of the *trnL-rpl32* chloroplast DNA region**

5 The preliminary phylogeny using the *trnL-rpl32* chloroplast DNA region included 215  
6 species representing all main lineages in *Ipomoea* (Muñoz-Rodríguez *et al.*, 2019) and one  
7 *Operculina pteripes* (G.Don) O'Donnell sample as outgroup (Table S2). We obtained new DNA  
8 extractions from 7 Ecuadorian and 1 Colombian specimens, whereas sequences for the other  
9 species were generated in a previous study and are available via GenBank (see Table S2).

10 We extracted DNA from herbarium samples using the Plant Tissue Mini protocol for  
11 QIAGEN DNEasy Plant Mini Kit. We used custom primers for amplification (VR27-F: 5'-  
12 GTAATACAATAAGGCGGATA; VR27-R: 5'-ATTACATGACAAGATAGTCTTG) with a reagent  
13 volume of 15 µl (7.3 µl H<sub>2</sub>O, 3 µl buffer, 0.7 µl MgCl<sub>2</sub>, 0.3 µl of each primer diluted to a  
14 concentration of 10X, 0.5 µl dNTPs, 1 µl BSA, 0.4 µl Taq polymerase, 1.5 µl sample DNA) and  
15 standard PCR conditions (5' at 80°C; 30 cycles of 1' at 95°C, 1' at 50°C, and 4' at 65°C and a  
16 final stage of 4' at 65°C). We cleaned the PCR reactions using the GeneJET PCR purification kit  
17 and sequenced the samples using Sanger sequencing at Source Bioscience.

18 We aligned the sequences using MAFFT v.7.310 (Kato & Standley, 2013) and edited the  
19 alignment in Geneious to remove all position with 25% gaps or more. We then inferred an  
20 Approximate Maximum Likelihood phylogeny using FastTree 2.1.10, GTR+Gamma model (Price  
21 *et al.*, 2010).

#### 22 **METHODS S2. Selection of *Ipomoea* probes for nuclear phylogenetic analysis**

23 Our analysis of nuclear DNA data utilized a subset of the nuclear probes used in a study on  
24 the origin of sweet potato published in 2018 (Muñoz-Rodríguez *et al.*, 2018). In this section we

25 present a detailed account of how the probes were generated. In 2014, we developed probes  
26 targeting 605 putative single copy nuclear regions of *Ipomoea* through comparison of genomic  
27 data from *I. lacunosa* and CDS regions of *Solanum tuberosum*. Regions between *Ipomoea* and  
28 *Solanum* with a one-to-one match at 70% identity along at least half the length of a *Solanum* CDS  
29 were filtered to retain *Ipomoea* loci that were at least 1000 bp. Along these loci, a set of 20,020  
30 100 bp custom RNA baits were developed by MycroArray (Ann Arbor, MI), excluding probes with  
31 GC content < 25%. These 20,020 baits matched unique positions in the scaffolded *I. lacunosa*  
32 genome and resulted in 605 preliminary *Ipomoea* probes, 1,018–9,646 bp long, located in 506  
33 different scaffolds.

34 Recently published high-quality genomes of diploid relatives of sweet potato (Hoshino *et*  
35 *al.*, 2016; Wu *et al.*, 2018; Li *et al.*, 2019) allowed a broader comparison with two other species in  
36 the sweet potato group, *I. trifida* and *I. triloba*. An initial Blast search revealed that 217 of our 605  
37 original probes overlapped at least partially with others, hence indicating that the set of probes in  
38 our previous study included a number of potentially duplicate regions that could have an effect in  
39 the phylogenetic trees inferred. We believe these to have originated from separate scaffolds of  
40 the partially assembled *I. lacunosa* genome that we used to design the bait set in 2014. We  
41 therefore cleaned the dataset and retained only the 388 probes that we were confident are truly  
42 single copy. We further mapped these 388 probes to all *Ipomoea* genomes available as of October  
43 2021 using Bowtie2 (end-to-end, -k 2, L = 15) (Langmead & Salzberg, 2012) and found that two  
44 of them align to more than one place in at least two of those genomes, hence removed them from  
45 the final set of probes. In summary, we used a set of 386 *Ipomoea* nuclear DNA probes that we  
46 are confident are single-copy regions in several species closely related to sweet potato. We used  
47 these regions for phylogenetic analysis of nuclear DNA data in this study.

### 48 **METHODS S3. Additional phylogenetic analyses of nuclear probes**

49 The analysis of nuclear probes presented in the main Methods section of this paper used  
50 only homozygous sites from the assemblies and discarded heterozygous sites. In addition, we  
51 also inferred additional analyses coding the heterozygous sites using ambiguous IUPAC  
52 characters. While programmes such as FastTree treat ambiguous IUPAC characters as Ns, IQ-  
53 Tree supports them, giving each represented character equal likelihood  
54 (<http://www.iqtree.org/doc/Frequently-Asked-Questions>). Other possibilities for generating the  
55 consensus offered by BCFtools *consensus*, such as always assigning the alternative allele in the  
56 consensus sequence (the default option) seemed less appropriate in our case.

57 We thus repeated the analysis of consensus sequences, this time including IUPAC

58 ambiguous characters, using partitioned ML analysis of concatenated alignments with automated  
59 model selection + merge in IQ-Tree 1.6.12 (Nguyen *et al.*, 2015; Kalyaanamoorthy *et al.*, 2017),  
60 and independent gene tree inference using IQ-Tree 1.6.12 with automated model selection  
61 followed by species tree inference using the coalescent in Astral III (Zhang *et al.*, 2018). We also  
62 ran Approximate ML analysis of unpartitioned concatenated alignments in multi-threaded double-  
63 precision FastTree 2.1.10<sup>54,71</sup> (GTR + gamma model), but since FastTree treats IUPAC  
64 ambiguous characters as Ns, the results (not shown) were the same as in the analysis using only  
65 homozygous sites.

66 Phylogenies inferred using this approach have the same topology as phylogenies inferred  
67 using homozygous sites only (Figure S8).

#### 68 **METHODS S4. Additional Principal Component analyses**

69 The PCA analysis presented in the main Methods section used a subset of samples of *I.*  
70 *batatas* and *I. trifida* to avoid bias due to different population sizes (Privé *et al.*, 2020).  
71 Nevertheless, we also ran two additional analyses using all *I. batatas* and *I. trifida* samples and  
72 including or not a linkage disequilibrium pre-pruning step. These analyses used 912 (no LD  
73 pruning) and 774 SNPs (with LD pruning) and the results are consistent with the analysis using a  
74 reduced sampling (Figure S9b).

#### 75 **METHODS S5. K-mer analysis of putative hybrid tetraploids**

76 We also tested GenomeScope2.0 with three samples of putative hybrid origin, namely one  
77 *Ipomoea tabascanana* (PI 518479) and two *I. batatas* var. *apiculata* (PI 518474 and K233). These  
78 samples had lower coverage (~30X) than the one Ecuadorian sample analysed.

79 **NOTES S1. Modern hybrids closely related to *Ipomoea batatas***

80 Two tetraploid entities associated with *I. batatas* have been described: *Ipomoea tabascanana*  
81 J.A.McDonald & D.F.Austin and *I. batatas* var. *apiculata* J.A.McDonald & D.F.Austin. Both entities  
82 were described in 1990, following fieldwork in Mexico by Daniel Austin a few years earlier  
83 (McDonald & Austin, 1990). According to the original publication where both entities were  
84 described, Daniel Austin collected one specimen of each in 1987. In a later visit (1991) to the site  
85 in search of *I. tabascanana*, the authors found no seeds and reported no new collections (Austin *et*  
86 *al.*, 1991), and in 1995 they collected one seed (Contreras *et al.*, 1995), which possibly is the  
87 original sample from which all subsequent studies including this species obtained their material.  
88 The species has not been collected since then. In other words, *I. tabascanana* is formally only known  
89 from a single collection and one seed, and no living populations have been reported in three  
90 decades. In subsequent studies, it was shown to be most likely of hybrid origin (Srisuwan, 2006;  
91 Muñoz-Rodríguez *et al.*, 2018).

92 Similarly, *Ipomoea batatas* var. *apiculata* has only been collected 5 times since 1845, all of  
93 them from the same locality in the vicinity of Veracruz, and Austin and collaborators treated it as  
94 “feral”, rather than wild. Its likely hybrid origin is shown in this paper. Our results support the  
95 recognition of this variety as another distinct entity of hybrid origin instead of a variety of *Ipomoea*  
96 *batatas*, and thus the name *Ipomoea apiculata* M.Martens & Galeotti may be more appropriate.  
97 We refrain from formally proposing this change here as ongoing studies will confirm whether this  
98 entity is distinct from or conspecific with *Ipomoea tabascanana* and the other tetraploid plants.

99 In summary, the very few specimens available for these two entities and the fact that they  
100 all likely come from the same locality raises doubts about their status. It is also not clear whether  
101 they represent stable tetraploid progeny or one-off occurrences. Further field explorations may  
102 clarify this question.



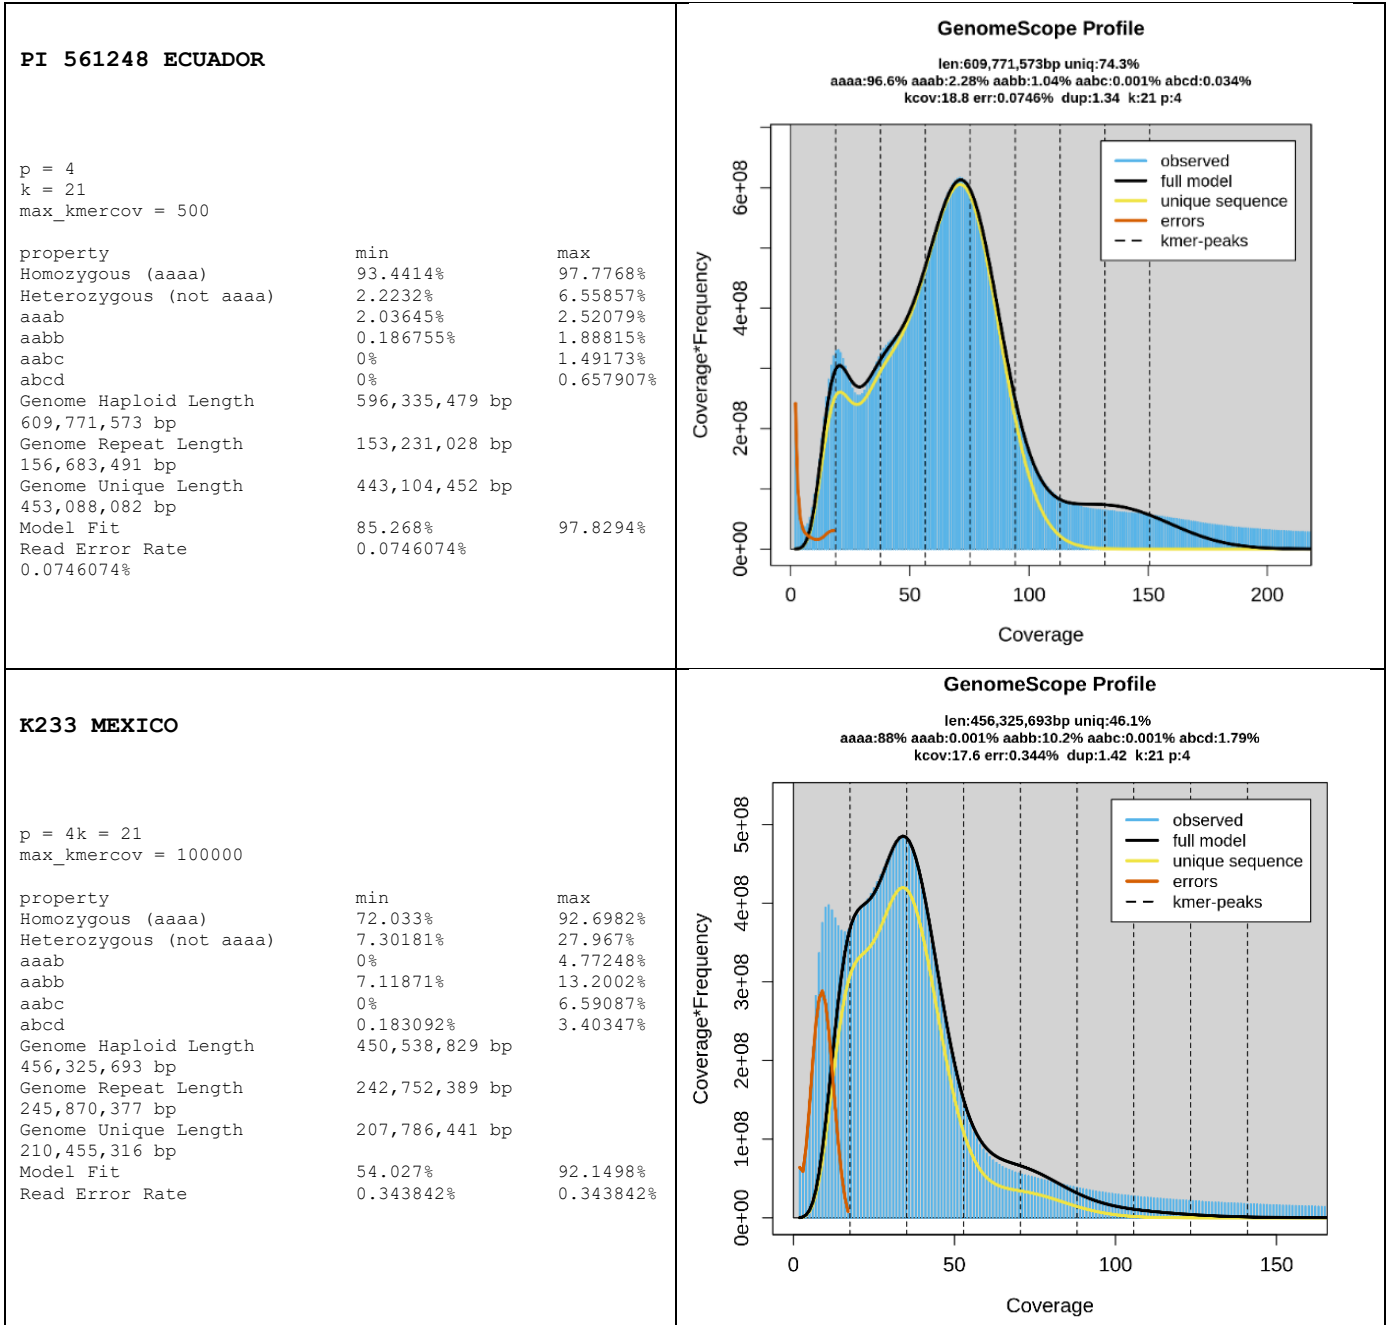

**PI 518474 MEXICO**

p = 4k = 21  
max\_kmercov = 100000

| property                | min            | max       |
|-------------------------|----------------|-----------|
| Homozygous (aaaa)       | 68.6825%       | 95.2674%  |
| Heterozygous (not aaaa) | 4.73264%       | 31.3175%  |
| aaab                    | 0%             | 2.11278%  |
| aabb                    | 4.73264%       | 13.9981%  |
| aabc                    | 0%             | 10.0273%  |
| abcd                    | 0%             | 5.17934%  |
| Genome Haploid Length   | 501,331,466 bp |           |
| 508,703,597 bp          |                |           |
| Genome Repeat Length    | 271,828,231 bp |           |
| 275,825,494 bp          |                |           |
| Genome Unique Length    | 229,503,235 bp |           |
| 232,878,104 bp          |                |           |
| Model Fit               | 51.9357%       | 92.8567%  |
| Read Error Rate         | 0.207173%      | 0.207173% |

**GenomeScope Profile**

len:508,703,597bp uniq:45.8%  
aaaa:88.6% aaab:0.001% aabb:9.37% aabc:0.895% abcd:1.17%  
kcov:15.8 err:0.207% dup:1.36 k:21 p:4

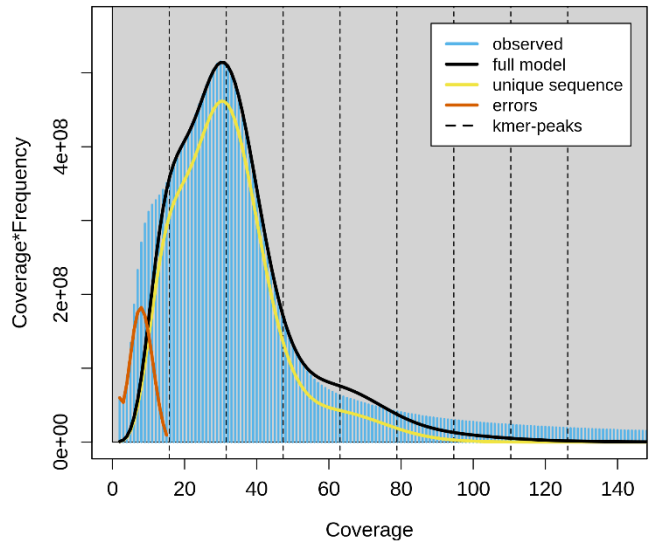

**PI 518479 MEXICO**

p = 4k = 21  
max\_kmercov = 100000

| property                | min            | max       |
|-------------------------|----------------|-----------|
| Homozygous (aaaa)       | 70.4436%       | 94.3532%  |
| Heterozygous (not aaaa) | 5.64682%       | 29.5564%  |
| aaab                    | 0%             | 4.35383%  |
| aabb                    | 5.64682%       | 13.5952%  |
| aabc                    | 0%             | 8.04151%  |
| abcd                    | 0%             | 3.56586%  |
| Genome Haploid Length   | 495,610,302 bp |           |
| 502,475,789 bp          |                |           |
| Genome Repeat Length    | 281,190,703 bp |           |
| 285,085,922 bp          |                |           |
| Genome Unique Length    | 214,419,599 bp |           |
| 217,389,866 bp          |                |           |
| Model Fit               | 49.5486%       | 92.6182%  |
| Read Error Rate         | 0.321655%      | 0.321655% |

**GenomeScope Profile**

len:502,475,789bp uniq:43.3%  
aaaa:88.1% aaab:0.001% aabb:9.62% aabc:0.77% abcd:1.52%  
kcov:16.9 err:0.322% dup:1.36 k:21 p:4

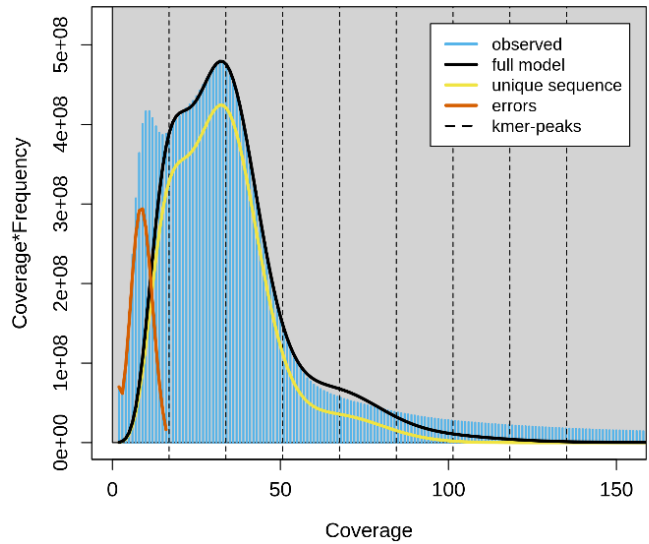

104

105

106 **NOTES S3. Description and additional information on *Ipomoea aequatoriensis***

107 *Description:*

108 Perennial twining herb to 3 metres. Roots fibrous or somewhat thickened to 1cm diam.  
109 (Figures S1-S4); storage roots not seen. Stems 1–3 (–4) mm diam., grey-green, drying reddish-  
110 brown on exposed surface, glabrous or thinly to densely pilose, especially at nodes, hairs  
111 sometimes asperous. Leaves petiolate, 4–14 × 3–13.5 cm, ovate, entire or, less commonly,  
112 shallowly 3-lobed or intermediate between the two states (Figures 4A-B); apex shortly acuminate  
113 to cuspidate, with obtuse, mucronate tip; base broadly cordate; margins subentire to undulate,  
114 weakly-developed lateral lobes sometimes present; veins palmately divided with prominent  
115 central rib; green adaxially, paler abaxially; glabrous to thinly pubescent on both surfaces, often  
116 with hairs along veins (Figures 4C-D); petioles 2–12.5 cm, thinly to densely pilose, with a pair of  
117 glands at junction with leaf base (Figure 4D). Inflorescence axillary, formed of solitary,  
118 pedunculate, usually dense, umbellate cymes with 5-24 flowers; peduncles straight to slightly  
119 curved, rarely forked upwards, (3–)9–30 cm, glabrous or thinly pilose; short secondary and tertiary  
120 peduncles generally present, 4-10 mm, noticeably thicker than pedicels; bracteoles c. 1–1.5 x 0.5  
121 mm, ovate-deltoid, acuminate, chartaceous, caducous; pedicels (3–)6–12(–17)mm, slender,  
122 glabrous; sepals unequal, oblong-elliptic to obovate, obtuse and mucronate (Figure 4E), the  
123 central vein prominent, often with a distinct fold below apical part, outer pair 3–7 x 2–2.5 mm long,  
124 ciliate, inner three 7–10 x 3–3.5 mm, somewhat chartaceous on margins, glabrous; corolla 3–4.5  
125 cm long, funnel-shaped, pale pink with darker centre, glabrous on the exterior; stamens unequal,  
126 two long and three shorter (Figure 4F), glabrous except glandular-hairy base; longest filament c.  
127 15 mm, shortest filament c. 6 mm; anthers 2.5 mm long, linear with sagittate base; style c. 20 mm  
128 long, glabrous; ovary pubescent (Figure 4G). Capsules (observed only on *Asplund* 16545) c. 5 x  
129 6 mm, appressed ovoid, pilose; seeds 3 x 2 mm, dark brown, glabrous.

130 *Habitat:*

131 Secondary forest, clearings, and riverside scrub. 0 – 750 m.

132 *Distribution:*

133 Coastal departments of Ecuador (El Oro, Esmeraldas, Guayas, Loja, Los Ríos, Manabí).

134 *Etymology:*

135 The name *aequatoriensis* is chosen for the distribution of the species, which grows on either side

136 of the Equator in Ecuador and possibly Colombia (see Notes below).

137 *Additional specimens:*

138 **ECUADOR. El Oro:** Arenillas, *Asplund, E.* 15676 (K, S); Atahualpa, *Cornejo, X.* 304 (GUAY,  
139 QCNE); El Guabo, *Austin, D. F. & De La Puente, F.* 7817/5298 (FTG; OXF); Machala, *Austin, D.*  
140 *F. & De La Puente, F.* 7820/5301 (FTG). **Esmeraldas:** Atacames, *Sparre, B.* 15341(S);  
141 Esmeraldas, *Asplund, E.* 16545 (S); *Austin, D. F. & De La Puente, F.* 7801/5282 (FTG); *Austin,*  
142 *D. F. & De La Puente, F.* 7802/5283 (FTG, CIP); *Balslev, H. et al.* 3131 (GB, QCA); *Hoover, W.*  
143 *S. et al.* 4129 (QCA); *Hudson, J.* 730 (US, MO); Borbón, *Austin, D. F. & De La Puente, F.*  
144 *7803/5284* (FTG, CIP), *Austin, D. F. & De La Puente, F.* 7804/5285 (FTG, CIP); *Besse, L. et al.*  
145 *2305* (QCA); *Cornejo, X. & Bonifaz, C.* 1867 (GUAY); *Játiva, C. & Epling, E.* 1191 (S); Quinde,  
146 *Bass, M. S.* 208 (QCNE); *Rick, C. M.* SAM2614 (OXF); Rio Cayapa, *Holm-Nielsen, L. et al.* 25318  
147 (ARIZ, AAU); *Kvist, L. P.* 40476 (QCA, QCNE); Tabuche, *Sparre, B.* 15517 (S); *Sparre, B.* 15286  
148 (S); *Sparre, B.* 15308 (S). **Guayas:** Ayangue, *Madsen J.E.* 50113 (QCA, QCNE); Guayaquil,  
149 *Austin, D. F. & De La Puente, F.* 7812/5293 (FTG); *Austin, D. F. & De La Puente, F.* 7815/5296  
150 (FTG); Isla Puná, *Madsen, J. E.* 64032 (GUAY, QCA, QCNE); Montanita, *Cornejo, X. & Bonifaz,*  
151 *C.* 2283 (AAU, GUAY); Naranjal, *Austin, D. F. & De La Puente, F.* 7816/5296 (FTG); San Ignacio,  
152 *Holmgren, I.* 88 (S). **Loja:** Cangonoma, *Austin, D. F. & De La Puente, F.* 7821/5302 (FTG);  
153 Puyango, *Austin, D. F. & De La Puente, F.* 7823/5304 (FTG); *Rick, C. M.* SAM5316 (OXF). **Los**  
154 **Ríos:** Rio Palenque, *Dodson, C. H. & McMahon, M. P.* 5112 (QCA); *McMahon, M. P.* 4207 (QCA);  
155 *Dodson, C. H. & Vrieze, J. M.* 4334 (QCA). **Manabí:** Jipijapa, *Montesdeoca, M. et al.* 677 (QAP);  
156 *Cerón, C. E. et al.* 18775 (OXF, QAP); San Placido, *Harling, G. & Andersson, L.* 24997 (QCA).

157 *Notes:*

158 The isotype specimen at CIP is also annotated with a separate collection number for Fermín  
159 de la Puente (5284). Several plants from Colombia resemble the Ecuadorian material, and the  
160 only specimen sequenced in this study is recovered with it in a strongly supported clade in  
161 phylogenetic analysis of nuclear sequence data (Figs. 2a, S7 and S8). Chloroplast data suggests,  
162 however, that a degree of introgression from hexaploid *I. batatas* may have occurred (Fig. 3).  
163 These Colombian specimens are not coastal but found at higher altitudes (up to 2000m), and  
164 there is an apparent gap in the distribution in southern Colombia (Figure 2b), although this could  
165 simply be the result of less collecting in the area.

166 **COLOMBIA. Caldas:** Risaralda, *Alvarez et al.* 5 (E, OXF); **Valle del Cauca:** Cali, *Kobayashi, M.*  
167 K500 (OXF); Calima, *Hugh-Jones, D. L.* 25 (K).

#### 168 **NOTES S4. HYBRID SPECIMENS IN OTHER STUDIES**

169 We have not been able to analyse all the material listed in earlier studies of tetraploid plants  
170 (Table S1). However, comparison of the phylogenetic results presented here with those presented  
171 by Yan *et al.* (2021) indicates that the material they designate as the “basal *I. batatas* 4x lineage”  
172 (accessions CIP 403270, CIP 695141, CIP 695150 and PI 518474) is most likely of modern hybrid  
173 origin, rather than being the tetraploid progenitor of hexaploid *I. batatas* as they suggest. This is  
174 supported by the fact that accession PI 518474 is a specimen collected by Fermín de la Puente  
175 with number 2908. Identified as *I. batatas* var. *apiculata*, that specimen is also included in our  
176 study and shown to be a likely modern hybrid. Meanwhile, no collection details or material were  
177 available on request for CIP 695141 or CIP 695150, but both accessions have previously been  
178 identified as *I. trifida* (Srisuwan *et al.*, 2006), and appear to form part of a crop improvement  
179 breeding programme at CIP (pers. comm., CIP germplasm bank). Collection details are not  
180 available for these specimens, but there are no reports of tetraploid material having been collected  
181 in Peru, and the distribution of *I. trifida* is restricted to Central America, the Caribbean and the  
182 northern coasts of Colombia and Venezuela. These specimens are therefore most likely to have  
183 originated through controlled crosses at CIP. Our results thus highlight the importance of  
184 comprehensive studies in differentiating between the various tetraploid entities connected with  
185 hexaploid sweetpotato and of accurately inferring their role in its origin.

#### 186 **SUPPLEMENTARY REFERENCES**

187 **Austin DF, de la Puente F, Contreras J. 1991.** *Ipomoea tabascanana*, an endangered tropical  
188 species. *Economic Botany* **45**: 435.

189 **Austin DF, Jarret RL, Tapia C, de la Puente F. 1993.** Collecting tetraploid *I. batatas* (L.) Lam.  
190 in Ecuador. *FAO/IBPGR Plant Genetic Resources Newsletter* **91/92**: 33–35.

191 **Contreras J, Austin DF, De la Puente F, Díaz J. 1995.** Biodiversity of sweet potato (*Ipomoea*  
192 *batatas*, Convolvulaceae) in Southern Mexico. *Economic Botany* **49**: 286-296.

193 **Hoshino A, Jayakumar V, Nitasaka E, Toyoda A, Noguchi H, Itoh T, Shin-I T, Minakuchi Y,**  
194 **Koda Y, Nagano AJ, et al. 2016.** Genome sequence and analysis of the Japanese morning  
195 glory *Ipomoea nil*. *Nature Communications* **7**: 13295.

196 **Kalyaanamoorthy S, Minh BQ, Wong TKF, von Haeseler A, Jermin LS. 2017.** ModelFinder:  
197 fast model selection for accurate phylogenetic estimates. *Nature Methods* **14**: 587–589.

- 198 **Katoh K, Standley DM. 2013.** MAFFT multiple sequence alignment software version 7:  
199 improvements in performance and usability. *Molecular Biology and Evolution* **30**: 772–780.
- 200 **Langmead B, Salzberg SL. 2012.** Fast gapped-read alignment with Bowtie 2. *Nature Methods*  
201 **9**: 357–359.
- 202 **Li M, Yang S, Xu W, Pu Z, Feng J, Wang Z, Zhang C, Peng M, Du C, Lin F, et al. 2019.** The  
203 wild sweetpotato (*Ipomoea trifida*) genome provides insights into storage root development.  
204 *BMC Plant Biology* **19**: 119.
- 205 **McDonald JA, Austin DF. 1990.** Changes and additions in *Ipomoea* sect. *Batatas*. *Brittonia* **42**:  
206 116–120
- 207 **Muñoz-Rodríguez P, Carruthers T, Wood JRI, Williams BRM, Weitemier K, Kronmiller B,**  
208 **Ellis D, Anglin NL, Longway L, Harris SA, et al. 2018.** Reconciling conflicting phylogenies in  
209 the origin of sweet potato and dispersal to Polynesia. *Current Biology* **28**: 1246-1256.e12.
- 210 **Muñoz-Rodríguez P, Carruthers T, Wood JRI, Williams BRM, Weitemier K, Kronmiller B,**  
211 **Ellis D, Anglin NL, Longway L, Harris SA, et al. 2019.** A taxonomic monograph of *Ipomoea*  
212 integrated across phylogenetic scales. *Nature Plants* **5**: 1136–1144.
- 213 **Nguyen L-T, Schmidt HA, von Haeseler A, Minh BQ. 2015.** IQ-TREE: a fast and effective  
214 stochastic algorithm for estimating Maximum-Likelihood phylogenies. *Molecular Biology and*  
215 *Evolution* **32**: 268–274.
- 216 **Price MN, Dehal PS, Arkin AP. 2010.** FastTree 2 – Approximately Maximum-Likelihood trees  
217 for large alignments (AFY Poon, Ed.). *PLoS ONE* **5**: e9490.
- 218 **Privé F, Luu K, Blum MGB, McGrath JJ, Vilhjálmsson BJ. 2020.** Efficient toolkit  
219 implementing best practices for principal component analysis of population genetic data.  
220 *Bioinformatics* **36**: 4449-4457.
- 221 **Srisuwan S, Sihachakr D, Siljak-Yakovlev S. 2006.** The origin and evolution of sweet potato  
222 (*Ipomoea batatas* Lam.) and its wild relatives through the cytogenetic approaches. *Plant*  
223 *Science* **171**: 424–433.
- 224 **Wu S, Lau KH, Cao Q, Hamilton JP, Sun H, Zhou C, Eserman L, Gemenet DC, Olukolu BA,**  
225 **Wang H, et al. 2018.** Genome sequences of two diploid wild relatives of cultivated sweetpotato  
226 reveal targets for genetic improvement. *Nature Communications* **9**: 4580.
- 227 **Yan M, Li M, Moeinzadeh M-H, Quispe-Huamanquispe DG, Fan W, Nie H, Wang Z, Heider**  
228 **B, Jarret R, Kreuze J, et al. 2021.** Haplotype-based phylogenetic analysis uncovers the  
229 tetraploid progenitor of sweet potato. *ResearchSquare (preprint)*.  
230 <https://doi.org/10.21203/rs.3.rs-750500/v1>
- 231 **Zhang C, Rabiee M, Sayyari E, Mirarab S. 2018.** ASTRAL-III: polynomial time species tree  
232 reconstruction from partially resolved gene trees. *BMC Bioinformatics* **19**: 153/
